# Supplementary material for: QTL detection for bread wheat processing quality in a nested association mapping population of semi-wild and domesticated wheat varieties
Source: BMC Plant Biol. 2022 Mar 21;22:129. doi: 10.1186/s12870-022-03523-x (PMC8935700; doi:10.1186/s12870-022-03523-x)
Supplement: Supplementary file 1 — Additional file 1: Table S1. Phenotype data of five parents in four environments and of the NAM population in individual environments and combined environments. [file 12870_2022_3523_MOESM1_ESM.xlsx]

## Sheet: Table S1
Supplementary Table 1
Phenotype data of five parents in four environments and of the NAM population in individual environments and combined environments.
NAM population parent		MlPT	MlPH	PkWd	WdEm
		Mean±sd	Mean±sd	Mean±sd	Mean±sd
YZ	common parent	2.41±0.65	63.59±3.13	35.64±2.98	14.58±7.10
CY	donor parent	2.08±0.28	65.78±0.93	31.04±3.18	11.70±3.90
HU	donor parent	4.53±0.01	69.54±3.34	39.98±0.72	21.58±0.18
YN	donor parent	1.83±0.22	68.38±0.09	31.28±0.98	6.73±0.68
YT	donor parent	2.86±0.60	66.55±2.94	28.13±0.91	16.43±7.05
Trait	Environment	CY-RILs	HU-RILs	YN-RILs	YT-RILs
		Mean (n=81) ±sd	Mean (n=96) ±sd	Mean (n=97) ±sd	Mean (n=91) ±sd
MlPT	E1	2.86±0.73	2.32±0.68	1.94±0.54	2.64±0.56
MlPT	E2	2.80±0.40	2.22±0.50	2.07±0.41	2.74±0.45
MlPT	E3	2.29±0.67	2.10±0.44	1.59±0.47	2.21±0.56
MlPT	E4	2.52±0.58	2.42±0.45	1.85±0.54	2.37±0.63
MlPT	BLUP	2.54±0.40	2.28±0.33	1.93±0.32	2.45±0.38
MlPH	E1	69.80±4.88	57.80±4.80	63.55±5.39	67.88±6.24
MlPH	E2	64.40±5.18	62.25±5.67	64.76±5.64	71.30±4.80
MlPH	E3	61.29±4.13	54.42±4.36	67.31±3.71	66.21±5.49
MlPH	E4	68.06±4.52	60.93±5.14	62.68±4.09	63.48±5.36
MlPH	BLUP	65.92±2.44	60.80±2.96	64.76±2.51	66.41±3.25
PkWd	E1	32.03±4.82	35.02±5.07	30.37±3.21	31.52±4.97
PkWd	E2	38.93±4.32	28.31±6.28	29.50±6.28	34.65±4.49
PkWd	E3	26.53±4.09	25.66±4.43	26.92±3.32	27.76±3.99
PkWd	E4	34.72±4.38	29.92±4.58	27.24±3.34	28.12±3.81
PkWd	BLUP	30.67±0.92	29.76±1.17	29.53±0.78	30.16±0.94
WdEm	E1	12.36±6.55	15.62±5.50	10.03±5.15	11.00±5.76
WdEm	E2	14.71±5.62	6.45±2.33	10.01±3.60	10.12±3.70
WdEm	E3	10.88±4.67	16.58±6.64	6.27±2.60	7.92±3.83
WdEm	E4	11.38±4.65	13.31±4.73	8.53±3.55	10.99±4.80
WdEm	BLUP	11.18±2.50	11.94±2.40	9.30±2.06	10.24±2.53
values are mean ± standard deviation.
The number of observation of means for YZ, CY, HU, YN and YT were 16, 8, 8, 8 and 8, respectively.
E1, 2016 Dezhou; E2, 2016 Taian; E3, 2016 Heze; E4, 2017Taian; BLUP, Best linear unbiased prediction.
The trait values of NAM population parents were among four environments (E1-E4).
YZ, Yanzhan 1; CY, Chayazheda29; HU, Hussar; YN, Yunnanxiaomai, YT, Yutiandaomai.
MlPT, Midline peak time; MlPH, Midline peak height; PkWd, Peak width; WdEm, Width at eight minutes.
